# Supplementary material for: A heterometallic sodium(i)–europium(iii)-organic layer exhibiting dual-responsive luminescent sensing for nitrofuran antibiotics, Cr2O72− and MnO4− anions
Source: Royal Society of Chemistry journal article supplement (doi:10.1039/c8dt04208j), 2019-01-01
Supplement: c8dt04208j1.pdf [file c8dt04208j1.pdf]

Supporting information

**A heterometallic sodium(I)-europium(III)-organic layer exhibiting dual-responsive luminescent sensing for nitrofurantoin antibiotics,  $\text{Cr}_2\text{O}_7^{2-}$  and  $\text{MnO}_4^-$  anions**

Shan Xu,<sup>a</sup> Jing-Jing Shi,<sup>a</sup> Bo Ding,<sup>a</sup> Zheng-Yu Liu,<sup>a</sup> Xiu-Guang Wang,<sup>a</sup> Xiao-Jun Zhao<sup>\*a, b</sup> and En-Cui

Yang<sup>\*a</sup>

**Table S1** Selected bond lengths (Å) and angles (deg) for **1**<sup>a</sup>

|                          |            |                                               |            |
|--------------------------|------------|-----------------------------------------------|------------|
| Eu(1)–O(1)               | 2.441(5)   | Eu(2)–O(10)                                   | 2.374(5)   |
| Eu(1)–O(2)               | 2.467(5)   | Eu(2)–O(11) <sup>#1</sup>                     | 2.511(4)   |
| Eu(1)–O(5)               | 2.473(5)   | Eu(2)–O(12) <sup>#1</sup>                     | 2.437(5)   |
| Eu(1)–O(6)               | 2.523(4)   | Eu(2)–O(14)                                   | 2.431(5)   |
| Eu(1)–O(8) <sup>#1</sup> | 2.392(5)   | Eu(2)–O(16)                                   | 2.312(5)   |
| Eu(1)–O(9)               | 2.315(5)   | Na(1)–O(2)                                    | 2.506(5)   |
| Eu(1)–O(13)              | 2.341(6)   | Na(1)–O(4) <sup>#5</sup>                      | 2.371(5)   |
| Eu(1)–O(15)              | 2.422(5)   | Na(1)–O(6)                                    | 2.292(6)   |
| Eu(2)–O(3) <sup>#3</sup> | 2.463(5)   | Na(1)–O(11) <sup>#2</sup>                     | 2.285(6)   |
| Eu(2)–O(4) <sup>#3</sup> | 2.453(5)   | Na(1)–O(14) <sup>#4</sup>                     | 2.546(6)   |
| Eu(2)–O(7) <sup>#1</sup> | 2.280(5)   | Na(1)–O(15)                                   | 2.406(5)   |
| O(1)–Eu(1)–O(2)          | 52.66(15)  | O(7) <sup>#1</sup> –Eu(2)–O(12) <sup>#1</sup> | 81.8(2)    |
| O(1)–Eu(1)–O(5)          | 79.45(19)  | O(7) <sup>#1</sup> –Eu(2)–O(14)               | 80.47(19)  |
| O(1)–Eu(1)–O(6)          | 102.53(17) | O(7) <sup>#1</sup> –Eu(2)–O(16)               | 110.70(18) |
| O(2)–Eu(1)–O(5)          | 92.22(18)  | O(10)–Eu(2)–O(3) <sup>#2</sup>                | 79.99(18)  |
| O(2)–Eu(1)–O(6)          | 71.35(17)  | O(10)–Eu(2)–O(4) <sup>#2</sup>                | 132.04(17) |
| O(5)–Eu(1)–O(6)          | 51.73(16)  | O(10)–Eu(2)–O(11) <sup>#1</sup>               | 129.42(17) |

---

|                                               |            |                                                |            |
|-----------------------------------------------|------------|------------------------------------------------|------------|
| O(8) <sup>#1</sup> –Eu(1)–O(1)                | 81.75(17)  | O(10)–Eu(2)–O(12) <sup>#1</sup>                | 78.55(17)  |
| O(8) <sup>#1</sup> –Eu(1)–O(2)                | 134.31(17) | O(10)–Eu(2)–O(14)                              | 149.13(17) |
| O(8) <sup>#1</sup> –Eu(1)–O(5)                | 80.88(17)  | O(12) <sup>#1</sup> –Eu(2)–O(3) <sup>#2</sup>  | 78.93(19)  |
| O(8) <sup>#1</sup> –Eu(1)–O(6)                | 129.54(17) | O(12) <sup>#1</sup> –Eu(2)–O(4) <sup>#2</sup>  | 96.22(19)  |
| O(8) <sup>#1</sup> –Eu(1)–O(15)               | 147.05(16) | O(12) <sup>#1</sup> –Eu(2)–O(11) <sup>#1</sup> | 52.00(16)  |
| O(13)–Eu(1)–O(6)                              | 148.25(18) | O(14)–Eu(2)–O(3) <sup>#2</sup>                 | 122.30(18) |
| O(9)–Eu(1)–O(2)                               | 141.91(16) | O(14)–Eu(2)–O(4) <sup>#2</sup>                 | 71.41(16)  |
| O(9)–Eu(1)–O(5)                               | 84.55(19)  | O(14)–Eu(2)–O(11) <sup>#1</sup>                | 72.53(17)  |
| O(9)–Eu(1)–O(6)                               | 77.17(16)  | O(14)–Eu(2)–O(12) <sup>#1</sup>                | 123.65(17) |
| O(9)–Eu(1)–O(8) <sup>#1</sup>                 | 82.72(18)  | O(16)–Eu(2)–O(3) <sup>#2</sup>                 | 82.10(18)  |
| O(9)–Eu(1)–O(13)                              | 107.29(19) | O(16)–Eu(2)–O(4) <sup>#2</sup>                 | 86.36(18)  |
| O(9)–Eu(1)–O(15)                              | 79.45(18)  | O(16)–Eu(2)–O(10)                              | 80.37(19)  |
| O(13)–Eu(1)–O(1)                              | 84.07(19)  | O(16)–Eu(2)–O(11) <sup>#1</sup>                | 149.97(18) |
| O(13)–Eu(1)–O(2)                              | 89.63(19)  | O(16)–Eu(2)–O(14)                              | 82.02(18)  |
| O(13)–Eu(1)–O(8) <sup>#1</sup>                | 81.94(19)  | O(4) <sup>#5</sup> –Na(1)–O(2)                 | 105.04(18) |
| O(13)–Eu(1)–O(15)                             | 77.28(18)  | O(4)–Na(1)–O(14) <sup>#4</sup>                 | 70.75(17)  |
| O(15)–Eu(1)–O(1)                              | 120.62(17) | O(15)–Na(1)–O(14) <sup>#4</sup>                | 113.59(19) |
| O(15)–Eu(1)–O(2)                              | 71.20(16)  | O(6)–Na(1)–O(2)                                | 74.53(19)  |
| O(15)–Eu(1)–O(5)                              | 124.26(16) | O(6)–Na(1)–O(4) <sup>#5</sup>                  | 100.1(2)   |
| O(15)–Eu(1)–O(6)                              | 72.65(16)  | O(6)–Na(1)–O(14) <sup>#4</sup>                 | 111.1(2)   |
| O(3) <sup>#2</sup> –Eu(2)–O(11) <sup>#1</sup> | 98.02(17)  | O(6)–Na(1)–O(15)                               | 77.15(18)  |
| O(4) <sup>#2</sup> –Eu(2)–O(3) <sup>#2</sup>  | 52.50(16)  | O(11) <sup>#3</sup> –Na(1)–O(4) <sup>#5</sup>  | 76.26(19)  |
| O(4) <sup>#2</sup> –Eu(2)–O(11) <sup>#1</sup> | 70.79(17)  | O(11) <sup>#3</sup> –Na(1)–O(14) <sup>#4</sup> | 74.26(18)  |
| O(7) <sup>#1</sup> –Eu(2)–O(4) <sup>#2</sup>  | 144.78(17) | O(11) <sup>#3</sup> –Na(1)–O(15)               | 106.0(2)   |

---

---

O(7)<sup>#1</sup>-Eu(2)-O(10)    82.32(19)    O(15)-Na(1)-O(2)    70.79(17)

O(7)<sup>#1</sup>-Eu(2)-O(11)<sup>#1</sup>    80.97(16)

<sup>a</sup> Symmetry codes: #1  $x, y + 1, z$ ; #2  $x - 1, 3/2 - y, z - 1/2$ ; #3  $-x, y + 1/2, 3/2 - z$ ; #4  $-x, y - 1/2, 3/2 - z$ ; #5  $1 - x, 1 - y, 2 - z$ ; #6  $1 + x, 3/2 - y, z + 1/2$ ; #7  $x, y - 1, z$ .

---

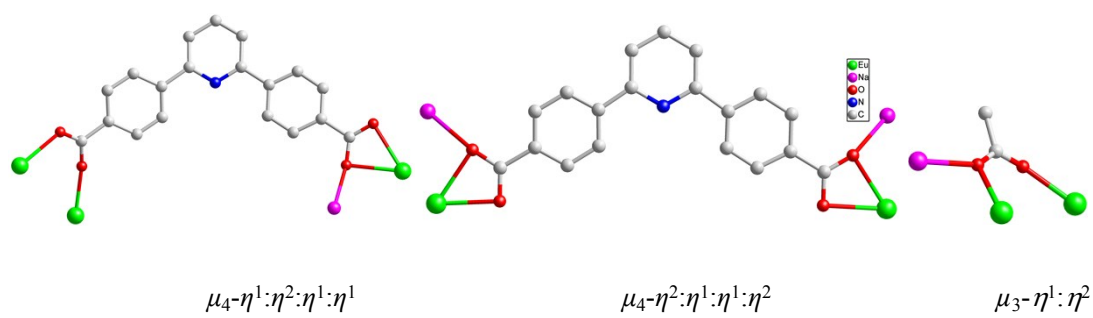

**Fig. S1** Binding modes of pddb<sup>2-</sup> and acetate anion.

**Table S2** Hydrogen-bonding parameters (Å, deg) in **1**<sup>a</sup>

| D–H···A      | <i>d</i> (D–H) | <i>d</i> (H···A) | <i>d</i> (D···A) | ∠(D–H···A) |
|--------------|----------------|------------------|------------------|------------|
| C28–H28···O1 | 0.93           | 2.56             | 3.209            | 128        |
| C48–H48···O3 | 0.93           | 2.41             | 3.304            | 162        |

<sup>a</sup> Symmetry codes: #1 – *x*, 1 – *y*, 2 – *z*.

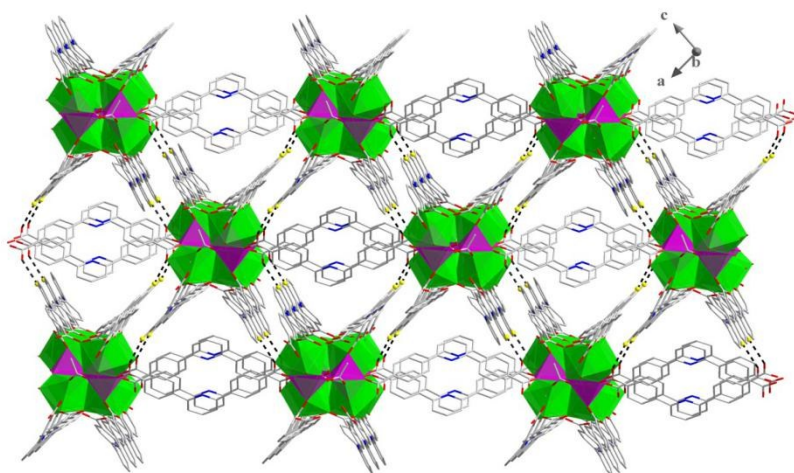

**Fig. S2** 3D supramolecular framework of **1**.

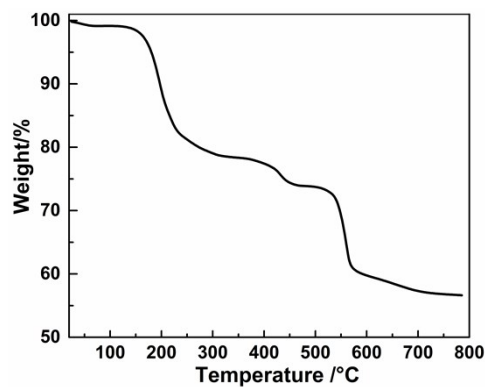

**Fig. S3** TGA curve of **1**.

**Table S3** Fluorescence lifetime of **1** in the solid state and dispersed in DMF in the absence and presence of NFZ, NFT and  $\text{Cr}_2\text{O}_7^{2-}$

| Sample                                            | $\tau_1$ ( $\mu\text{s}$ ) | %    | $\tau_2$ ( $\mu\text{s}$ ) | %     | Lifetime ( $\mu\text{s}$ ) |
|---------------------------------------------------|----------------------------|------|----------------------------|-------|----------------------------|
| <b>1</b>                                          | 317                        | 2.19 | 971                        | 97.81 | 1018.78                    |
| <b>1</b> -DMF suspension                          | 87                         | 2.77 | 959                        | 97.23 | 956.36                     |
| <b>1</b> + NFZ (0.13 mM)                          | 95                         | 2.46 | 958                        | 97.56 | 958.07                     |
| <b>1</b> + NFT (0.13 mM)                          | 85                         | 2.07 | 954                        | 97.93 | 951.56                     |
| <b>1</b> + FZD (0.13 mM)                          | 94                         | 2.26 | 951                        | 97.74 | 950.51                     |
| <b>1</b> + $\text{Cr}_2\text{O}_7^{2-}$ (0.67 mM) | 109                        | 2.73 | 955                        | 97.27 | 958.71                     |
| <b>1</b> + $\text{MnO}_4^-$ (0.67 mM)             | 89                         | 1.68 | 955                        | 98.32 | 953.71                     |



**Table S4** Standard deviation ( $\sigma$ ) calculated from the five blank measurements.

| Blank Readings                  | NFZ      | NFT      | FDZ      | Cr <sub>2</sub> O <sub>7</sub> <sup>2-</sup> | MnO <sub>4</sub> <sup>-</sup> |
|---------------------------------|----------|----------|----------|----------------------------------------------|-------------------------------|
| #1 Fluorescence Intensity (CPS) | 1114385  | 1114385  | 1114385  | 1056255                                      | 1056255                       |
| #2 Fluorescence Intensity (CPS) | 1110000  | 1110000  | 1110000  | 1067350                                      | 1067350                       |
| #3 Fluorescence Intensity (CPS) | 1111070  | 1111070  | 1111070  | 1057650                                      | 1057650                       |
| #4 Fluorescence Intensity (CPS) | 1108240  | 1108240  | 1108240  | 1055530                                      | 1055530                       |
| #5 Fluorescence Intensity (CPS) | 1093660  | 1093660  | 1093660  | 1048050                                      | 1048050                       |
| Standard Deviation ( $\sigma$ ) | 8038.767 | 8038.767 | 8038.767 | 6898.514                                     | 6898.514                      |

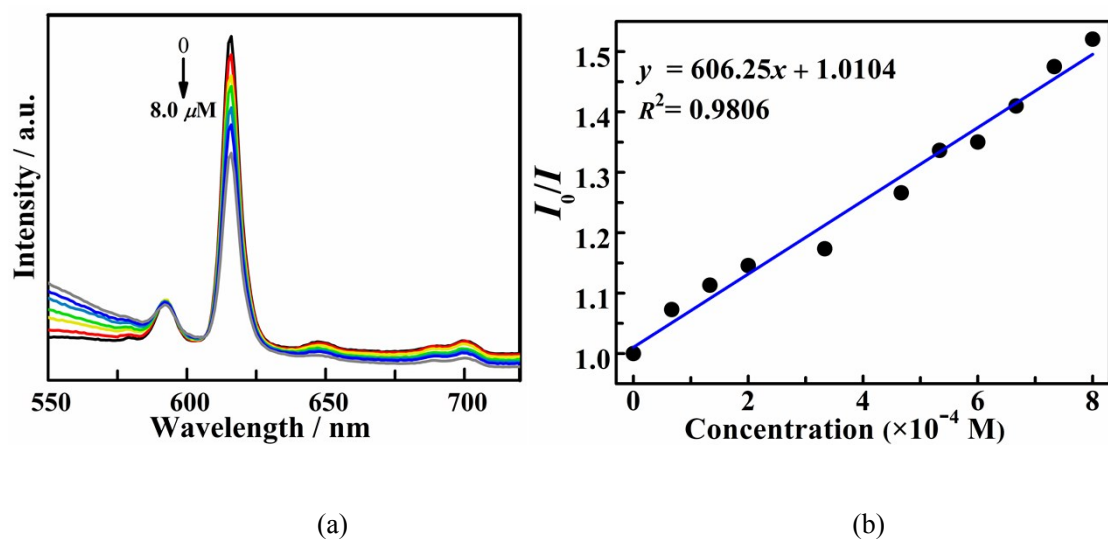

**Fig. S4** (a) Fluorescence spectra of **1** upon incremental addition of  $\text{Cr}_2\text{O}_7^{2-}$  in alkaline DMF solution. (b)

Plot of  $I_0/I$  vs.  $[\text{Cr}_2\text{O}_7^{2-}]$  in alkaline DMF solution (The blue solid lines represent the linear fit to the Stern–Volmer equation).

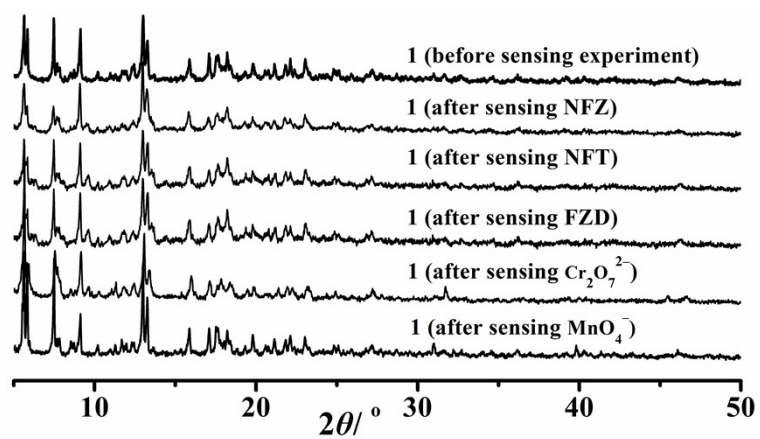

**Fig. S5** XRD patterns of **1** before after detecting of NFs,  $\text{Cr}_2\text{O}_7^{2-}$  and  $\text{MnO}_4^-$ .

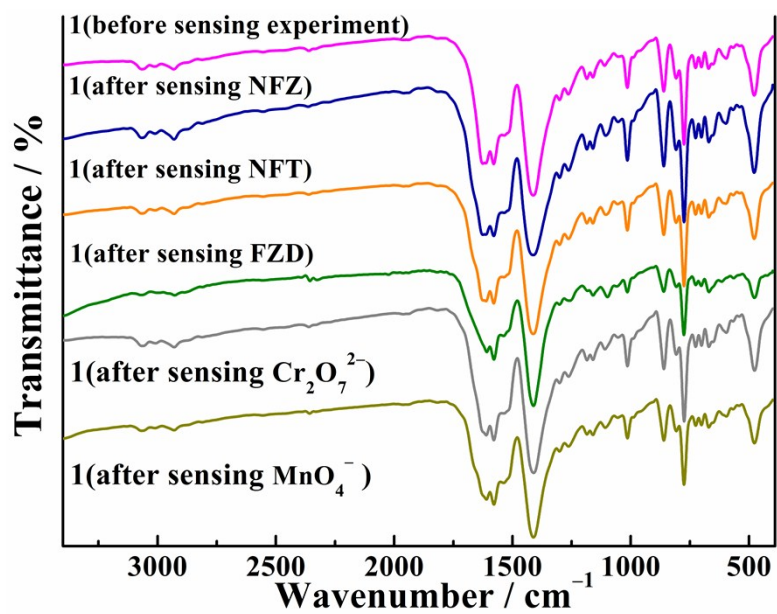

**Fig. S6** FT-IR spectra of **1** before and after the detection of NFs, Cr<sub>2</sub>O<sub>7</sub><sup>2-</sup> and MnO<sub>4</sub><sup>-</sup>.
